# Supplementary material for: Growth Dynamic and Threshold Values for Spermicidal Effects of Multidrug-Resistant Bacteria in Extended Boar Semen
Source: MDPI journal article supplement (doi:10.3390/microorganisms11030788), 2023-03-19
Supplement: s1 [file s1]

Supplemental Table S1: Susceptibility test (MIC) of four bacterial species isolated from semen extended in BeltsvilleThawing Solution with 0.25 mg/mL gentamicin sulfate.

|                               | Bacterial species                             |                                            |                                              |                                                      |
|-------------------------------|-----------------------------------------------|--------------------------------------------|----------------------------------------------|------------------------------------------------------|
| Antibiotic                    | <i>Serratia marcescens</i><br>F/19/002835/M-1 | <i>Klebsiella oxytoca</i><br>F/16/001936/M | <i>Burkholderia cepacia</i><br>F/18/003653/M | <i>Achromobacter xylosoxidans</i><br>F/19/002835/M-2 |
| Amoxicillin / Clavulanic acid | 8/4                                           | 16/8                                       | $\geq 32/16$                                 | 8/4                                                  |
| Ampicillin                    | 8                                             | $\geq 64$                                  | $\geq 32$                                    | 8                                                    |
| Ceftiofur                     | $\geq 8$                                      | 0,5                                        | $\geq 8$                                     | $\geq 8$                                             |
| Cephalothin                   | 16                                            | $\geq 32$                                  | $\geq 32$                                    | 16                                                   |
| Colistin                      | 2                                             | $\leq 0,031$                               | $\geq 4$                                     | 2                                                    |
| Enrofloxacin                  | 1                                             | $\geq 8$                                   | 0,25                                         | 1                                                    |
| Erythromycin                  | $\geq 8$                                      | 4                                          | $\geq 8$                                     | $\geq 8$                                             |
| Florfenicol                   | 4                                             | $\geq 16$                                  | 8                                            | 4                                                    |
| Gentamicin                    | $\geq 16$                                     | $\geq 32$                                  | $\geq 16$                                    | $\geq 16$                                            |
| Penicillin G                  | $\geq 16$                                     | $\geq 128$                                 | $\geq 16$                                    | $\geq 16$                                            |
| Spectinomycin                 | $\geq 128$                                    | $\geq 16$                                  | $\geq 128$                                   | $\geq 128$                                           |
| Tetracyclin                   | 2                                             | $\geq 64$                                  | $\geq 16$                                    | 2                                                    |
| Tiamulin                      | $\geq 64$                                     | $\geq 64$                                  | $\geq 64$                                    | $\geq 64$                                            |
| Tilmicosin                    | $\geq 32$                                     | $\geq 8/152$                               | $\geq 32$                                    | $\geq 32$                                            |
| Trimethoprim / Sulfonamid     | $\leq 0,25/4,8$                               | 64                                         | 1/19                                         | $\leq 0,25/4,8$                                      |
| Tulathromycin                 | $\geq 128$                                    | 16/8                                       | $\geq 128$                                   | $\geq 128$                                           |

Resistance testing is performed by microdilution method according to CLSI Vet01, CLSI Vet01S, CLSI Vet06, CLSI M100S or According to scientifically proven procedures.

The numerical value corresponds to the Minimum Inhibitory Concentration (MIC) of the active substance in  $\mu\text{g/ml}$ .
